# Supplementary material for: Combinatorial crystal synthesis of ternary solids based on 2-methylresorcinol
Source: Royal Society of Chemistry journal article supplement (doi:10.1039/c5ce01280e), 2015-01-01
Supplement: c5ce01280e1.pdf [file c5ce01280e1.pdf]

## Supporting information

### Combinatorial crystal synthesis of ternary solids based on 2-methylresorcinol

Niyaz A. Mir<sup>#</sup>, Ritesh Dubey<sup>#</sup>, Srinu Tothadi<sup>#</sup>, Gautam R. Desiraju\*  
Solid State and Structural Chemistry Unit,  
Indian Institute of Science, Bangalore 560 012, India

#### 1. Characterization techniques

##### (a) Single crystal X-ray diffraction

Single crystal x-ray data for all crystals were collected on a *Rigaku Mercury 375/M CCD (XtaLAB mini)* diffractometer using graphite monochromator Mo-K $\alpha$  radiation at 150 K and were processed with *Rigaku crystal clear software*.<sup>1</sup> Structure solution and refinement were performed using SHELX-2013<sup>2</sup> embedded in the WinGX suite.<sup>3</sup> Refinement of coordinates and isotropic thermal parameters of non-hydrogen atoms were carried out by the full-matrix least-squares method. Mercury version 3.5 was used for molecular representations and packing diagrams.<sup>4</sup> Acidic hydrogen atoms, especially in MRE, were located by difference Fourier maps while in other cases also at the calculated positions in the riding model.

1. CrystalClear 2.0, *Rigaku Corporation*, Tokyo, Japan.
2. G. M. Sheldrick, *Acta Crystallogr., Sect. C*, 2015, **71**, 3-8.
3. L. J. Farrugia, *J. Appl. Crystallogr.* 1999, **32**, 837.
4. C. F. Macrae, P. R. Edgington, P. McCabe, E. Pidcock, G. P. Shields, R. Taylor, M. Towler, J. van de Streek, *J. Appl. Crystallogr.*, 2006, **39**, 453.

##### (b) Differential Scanning Calorimetry (DSC)

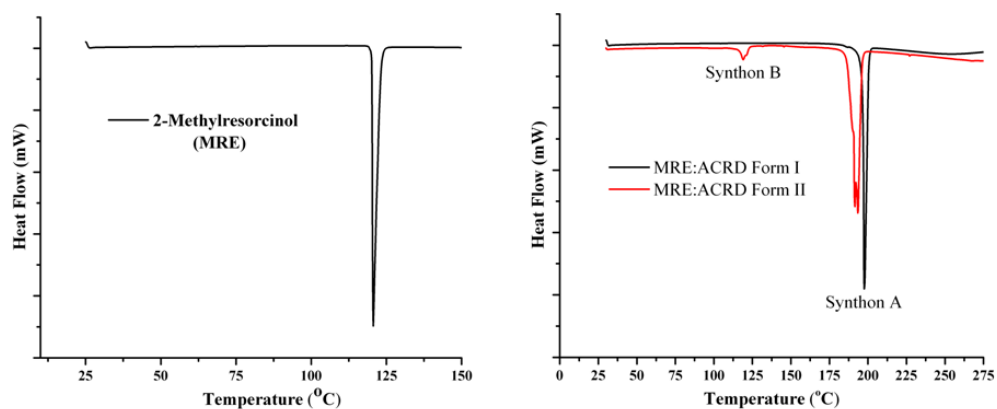

DSC profile of MRE (left). Thermal behaviour of 1:1 and 1:2 MRE:ACR crystal forms (right). Note the high temperature phase transition in metastable form II.

## 2. Crystallization Details:

- a) *2-Methylresorcinol (1)*: Colorless diffraction quality crystals were obtained from chloroform.
- b) *2-Methylresorcinol:2,2'-bipyridine (2)*: Liquid assisted grinding was performed on a 1:1 mixture of the precursor compounds with THF as a solvent. Colorless diffraction quality crystals were obtained in 2-3 days from benzene.
- c) *2-Methylresorcinol:4-phenylpyridine (3)*: An equimolar mixture of 2-methylresorcinol and 4-phenylpyridine was ground with 2-3 drops of THF (liquid assisted grinding). Colorless diffraction quality crystals were obtained from acetone or benzene after 2-3 days.
- d) *2-Methylresorcinol:1,10-phenanthroline (4)*: An equimolar mixture of 2-methylresorcinol and 1,10-phenanthroline was ground with 2-3 drops of THF. Colorless diffraction quality crystals were obtained from benzene or acetonitrile after 2-3 days.
- e) *2-Methylresorcinol:7,8-benzoquinoline (5)*: Both compounds were taken in 1:1 ratio and ground together with 2-3 drops of THF in a mortar and with a pestle for ten minutes. Purple colored diffraction quality crystals were obtained from benzene after 4 days.
- f) *2-Methylresorcinol:4-aminopyridine (6)*: An equimolar mixture of 2-methylresorcinol and 4-aminopyridine was ground in a mortar with a pestle for ten minutes with 2-3 drops of methanol. Light brown color diffraction quality crystals were obtained after 4 days from chloroform.
- g) *2-Methylresorcinol:4-dimethylaminopyridine (7)*: Both the compounds were taken in 1:1 ratio and ground together with 2-3 drops of methanol in a mortar with a pestle for ten minutes. Light brown color diffraction quality crystals were obtained after 4-5 days from chloroform.
- h) *2-Methylresorcinol:quinoxaline (8)*: Liquid assisted grinding was performed with THF as a solvent. Light brown color diffraction quality crystals were obtained after 4 days from benzene at 5°C.

- i) *2-Methylresorcinol:2,3-dimethylquinoxaline (9)*: An equimolar mixture of 2-methylresorcinol and 2,3-dimethylquinoxaline was ground in a mortar with a pestle for ten minutes with 2-3 drops of methanol. Light green color diffraction quality crystals were obtained from nitromethane.
- j) *2-Methylresorcinol:tetramethylpyrazine (10)*: 1:2 mixture of 2-methylresorcinol and tetramethylpyrazine was ground in a mortar with a pestle for ten minutes with 2-3 drops of THF. Colorless diffraction quality crystals were obtained after 4 days from benzene.
- k) *2-Methylresorcinol:1,2-bis(4-pyridyl)ethylene (11)*: Both compounds were taken in 1:1 ratio and ground together with 2-3 drops of THF in a mortar with a pestle for ten minutes. Orange color diffraction quality crystals were obtained from nitromethane.
- l) *2-Methylresorcinol:1,2-bis(4-pyridyl)ethane (12)*: Both compounds were taken in 1:1 ratio and ground together with 2-3 drops of THF in a mortar with a pestle for 10-15 minutes. Colorless diffraction quality crystals of the 1:1 solid were obtained from nitromethane.
- m) *2-Methylresorcinol:4,4'-azopyridine (13)*: Both compounds were taken in 1:1 ratio and ground together with 2-3 drops of THF in a mortar with a pestle for 10-15 minutes. Red color diffraction quality crystals were obtained from benzene.
- n) *2-Methylresorcinol:phenazine (14)*: Both compounds were taken in 1:1 ratio and ground together with 2-3 drops of THF in a mortar with a pestle for 10-15 minutes. Green colored diffraction quality crystals were obtained from benzene.
- o) *2-Methylresorcinol:acridine-Form I (15)*: Both compounds were taken in 1:1 ratio and ground together with 2-3 drops of THF in a mortar with a pestle for 10-15 minutes. Yellow colored diffraction quality crystals were obtained after 4-5 days from benzene.
- p) *2-Methylresorcinol:acridine-Form II (16)*: Both compounds were taken in 1:1 ratio and ground together with 2-3 drops of THF in a mortar with a pestle for 10-15 minutes. Yellow colored diffraction quality crystals were obtained after 4 days from ethanol. Similar crystals could also be obtained by sublimation within 5 to 6 hours of a finely ground 1:2 stoichiometric mixture.
- q) *2-Methylresorcinol:4-dimethylaminopyridine:Phenazine (17)*: An equimolar mixture of 2-methylresorcinol, 4-dimethylaminopyridine and phenazine was ground in a mortar with

a pestle for ten minutes with 2-3 drops of THF. Green colored diffraction quality crystals were obtained after 5 days from nitromethane.

- r) *2-Methylresorcinol:4-dimethylaminopyridine:tetramethylpyrazine (18)*: An equimolar mixture of 2-methylresorcinol, 4-dimethylaminopyridine and tetramethylpyrazine was ground in a mortar with a pestle for ten minutes with 2-3 drops of THF. Colorless diffraction quality crystals were obtained after 5 days from a 1:1 solvent mixture of nitromethane and benzene.
- s) *2-Methylresorcinol:4-phenylpyridine:tetramethylpyrazine (19)*: An equimolar mixture of 2-methylresorcinol, 4-phenylpyridine and tetramethylpyrazine was ground in a mortar with a pestle for ten minutes with 2-3 drops of THF. Colorless diffraction quality crystals were obtained after 5 days from nitromethane.
- t) *2-Methylresorcinol:4-dimethylaminopyridine:2,3-dimethylquinoxaline (20)*: An equimolar mixture of 2-methylresorcinol, 4-dimethylaminopyridine and 2,3-dimethylquinoxaline was ground in a mortar with a pestle for ten minutes with 2-3 drops of THF. Colorless block shaped crystals were obtained after 4 days from nitromethane.
- u) *2-Methylresorcinol: 1,10-phenanthroline: 4,4'-bipyridine (21)*: An equimolar mixture of 2-methylresorcinol, 1,10-phenanthroline and 4,4'-bipyridine was ground in a mortar and pestle for ten minutes with 2-3 drops of THF. Colorless block shaped crystals were obtained after 5 days from nitromethane.
- v) *2-Methylresorcinol: 1,10-phenanthroline: 4-phenylpyridine (22)*: An equimolar mixture of 2-methylresorcinol, 1,10-phenanthroline and 4-phenylpyridine was ground in a mortar with a pestle for ten minutes with 2-3 drops of THF. Colorless block shaped crystals were obtained after 4 days from nitromethane.

### 3. Unsuccessful experimental efforts for the crystal synthesis of ternary solids:

|   | Compounds    | Ratio | Crystallizing medium | Result           |
|---|--------------|-------|----------------------|------------------|
| 1 | MRE: PHE:ACR | 1:1:1 | Chloroform           | Binary (MRE:PHE) |
| 2 | MRE: PHE:ACR | 1:1:1 | Ethyl acetate        | Binary (MRE:PHE) |
| 3 | MRE: PHE:ACR | 2:1:1 | Ethanol              | Binary (MRE:PHE) |
| 4 | MRE: PHE:4PP | 1:1:1 | Nitromethane         | Binary (MRE:PHE) |
| 5 | MRE: PHE:4PP | 2:1:1 | Nitromethane         | Binary (MRE:PHE) |

|    |                  |       |                          |  |                          |
|----|------------------|-------|--------------------------|--|--------------------------|
|    |                  |       |                          |  | Binary (MRE:4PP)         |
| 6  | MRE: PHE:110PHE  | 2:1:1 | Nitromethane             |  | Binary (MRE:PHE)         |
| 7  | MRE: PHE:4AP     | 1:1:1 | Acetone                  |  | Binary (MRE:4AP)         |
| 8  | MRE: PHE:4AP     | 1:1:1 | Ethanol                  |  | Binary (MRE:4AP)         |
| 9  | MRE: 110PHE:BZQL | 1:1:1 | Nitromethane             |  | Binary (MRE:BZQL)        |
| 10 | MRE: 110PHE:BZQL | 1:1:1 | Benzene                  |  | Binary (MRE:BZQL)        |
| 11 | MRE:110PHE:4BP   | 1:1:1 | Benzene                  |  | Binary (MRE:4BP)         |
| 12 | MRE:110PHE:4PP   | 1:1:1 | CHCl <sub>3</sub>        |  | Binary (MRE:110PHE)      |
| 13 | MRE:110PHE:4PP   | 1:1:1 | Benzene                  |  | Binary (MRE:110PHE)      |
| 14 | MRE:110PHE:4DMAP | 1:1:1 | Nitromethane             |  | Binary (MRE:4DMAP)       |
| 15 | MRE:110PHE:4DMAP | 1:1:1 | EtOH                     |  | Binary (MRE:4DMAP)       |
| 16 | MRE:110PHE:4AP   | 1:1:1 | Acetonitrile             |  | Binary (MRE:110PHE)      |
| 17 | MRE:110PHE:4AP   | 1:1:1 | Nitromethane             |  | Binary (MRE:110PHE)      |
| 18 | MRE:110PHE:4AP   | 1:1:1 | Methanol                 |  | Binary (MRE:110PHE)      |
| 19 | MRE: ACR:4PP     | 1:1:1 | Nitromethane             |  | Binary (MRE:ACR form I)  |
| 20 | MRE: ACR:4PP     | 1:1:1 | Nitromethane: Chloroform |  | Binary (MRE:ACR Form I)  |
| 21 | MRE: ACR:4DMAP   | 1:1:1 | Nitromethane             |  | Binary (MRE:ACR form I)  |
| 22 | MRE: ACR:4DMAP   | 2:1:1 | Ethanol                  |  | Binary (MRE:ACR form II) |
| 23 | MRE: ACR:4DMAP   | 2:1:1 | Nitromethane             |  | Binary (MRE:4DMAP)       |
| 24 | MRE: BZQL:4BAP   | 1:1:1 | Nitromethane             |  | Binary (MRE:4BP)         |
| 25 | MRE: BZQL:4BAP   | 1:1:1 | Benzene                  |  | Binary (MRE:4BP)         |

#### 4. Crystallographic information

| Compound          | 1                                            | 2                                                             | 3                                                             | 4                                                             | 5                                                             | 6                                                             |
|-------------------|----------------------------------------------|---------------------------------------------------------------|---------------------------------------------------------------|---------------------------------------------------------------|---------------------------------------------------------------|---------------------------------------------------------------|
| CCDC No.          | 1060872                                      | 1060873                                                       | 1060874                                                       | 1060875                                                       | 1060876                                                       | 1060877                                                       |
| Molecular Formula | C <sub>7</sub> H <sub>8</sub> O <sub>2</sub> | C <sub>17</sub> H <sub>16</sub> N <sub>2</sub> O <sub>2</sub> | C <sub>18</sub> H <sub>17</sub> N <sub>1</sub> O <sub>2</sub> | C <sub>19</sub> H <sub>16</sub> N <sub>2</sub> O <sub>2</sub> | C <sub>20</sub> H <sub>17</sub> N <sub>1</sub> O <sub>2</sub> | C <sub>12</sub> H <sub>14</sub> N <sub>2</sub> O <sub>2</sub> |
| Formula Weight    | 124.13                                       | 280.32                                                        | 279.33                                                        | 304.34                                                        | 303.35                                                        | 218.25                                                        |
| Crystal System    | Monoclinic                                   | Monoclinic                                                    | Orthorhombic                                                  | Monoclinic                                                    | Monoclinic                                                    | Monoclinic                                                    |
| Space Group       | <i>P2<sub>1</sub>/n</i>                      | <i>P2<sub>1</sub>/n</i>                                       | <i>Pbca</i>                                                   | <i>P2<sub>1</sub>/n</i>                                       | <i>P2<sub>1</sub>/n</i>                                       | <i>P2<sub>1</sub>/n</i>                                       |
| a (Å)             | 9.117(6)                                     | 7.6951(10)                                                    | 11.3265(10)                                                   | 7.900(4)                                                      | 7.842(2)                                                      | 7.986(5)                                                      |
| b (Å)             | 11.604(8)                                    | 20.299(2)                                                     | 12.4430(11)                                                   | 22.159(11)                                                    | 21.894(4)                                                     | 16.748(10)                                                    |
| c (Å)             | 18.108(12)                                   | 9.089(1)                                                      | 21.1449(19)                                                   | 8.964(5)                                                      | 9.260(3)                                                      | 8.276(5)                                                      |
| α (°)             | 90                                           | 90                                                            | 90                                                            | 90                                                            | 90                                                            | 90                                                            |

|                                           |           |           |           |            |             |            |
|-------------------------------------------|-----------|-----------|-----------|------------|-------------|------------|
| $\beta$ (°)                               | 92.885(8) | 92.677(6) | 90        | 106.540(5) | 106.278(12) | 90.474(8)  |
| $\gamma$ (°)                              | 90        | 90        | 90        | 90         | 90          | 90         |
| V (Å <sup>3</sup> )                       | 1913.0(2) | 1418.2(3) | 2980.1(5) | 1504.3(14) | 1526.1(7)   | 1106.9(12) |
| $\rho_{\text{calc}}$ (g/cm <sup>3</sup> ) | 1.293     | 1.313     | 1.245     | 1.344      | 1.320       | 1.310      |
| <b>F(000)</b>                             | 792       | 592       | 1184      | 640        | 640         | 464        |
| $\mu$ . (mm <sup>-1</sup> )               | 0.094     | 0.087     | 0.081     | 0.088      | 0.083       | 0.091      |
| <b>T (K)</b>                              | 150(2)    | 150(2)    | 150(2)    | 150(2)     | 150(2)      | 150(2)     |
| $\lambda$ (Å)                             | 0.71073   | 0.71073   | 0.71073   | 0.71073    | 0.71073     | 0.71073    |
| <b>Total Reflns.</b>                      | 19457     | 14611     | 29717     | 15128      | 16018       | 11480      |
| <b>Unique Reflns.</b>                     | 4409      | 3239      | 3410      | 3448       | 3507        | 2534       |
| <b>Completeness (%)</b>                   | 99.8      | 99.8      | 99.8      | 99.6       | 99.8        | 99.8       |
| <b>R<sub>int</sub></b>                    | 0.081     | 0.099     | 0.079     | 0.093      | 0.165       | 0.092      |
| <b>R<sub>1</sub> (F<sup>2</sup>)</b>      | 0.0524    | 0.0522    | 0.0514    | 0.0484     | 0.0682      | 0.0488     |
| <b>wR<sub>2</sub>(F<sup>2</sup>)</b>      | 0.1589    | 0.1697    | 0.1230    | 0.1492     | 0.2026      | 0.1559     |
| <b>GooF</b>                               | 1.14      | 1.11      | 1.16      | 1.10       | 1.15        | 1.13       |
| <b>2<math>\theta</math></b>               | 54        | 54        | 54        | 54         | 54          | 54         |

| <b>Compound</b>                | <b>7</b>                                                      | <b>8</b>                                                      | <b>9</b>                                                      | <b>10</b>                                                     | <b>11</b>                                                     | <b>12</b>                                                     |
|--------------------------------|---------------------------------------------------------------|---------------------------------------------------------------|---------------------------------------------------------------|---------------------------------------------------------------|---------------------------------------------------------------|---------------------------------------------------------------|
| <b>CCDC No.</b>                | 1060878                                                       | 1060879                                                       | 1060880                                                       | 1060881                                                       | 1060882                                                       | 1060883                                                       |
| <b>Molecular Formula</b>       | C <sub>14</sub> H <sub>18</sub> N <sub>2</sub> O <sub>2</sub> | C <sub>22</sub> H <sub>22</sub> N <sub>2</sub> O <sub>4</sub> | C <sub>17</sub> H <sub>18</sub> N <sub>2</sub> O <sub>2</sub> | C <sub>15</sub> H <sub>20</sub> N <sub>2</sub> O <sub>2</sub> | C <sub>19</sub> H <sub>18</sub> N <sub>2</sub> O <sub>2</sub> | C <sub>19</sub> H <sub>20</sub> N <sub>2</sub> O <sub>2</sub> |
| <b>Formula Weight</b>          | 246.30                                                        | 378.42                                                        | 282.33                                                        | 260.33                                                        | 306.35                                                        | 308.37                                                        |
| <b>Crystal System</b>          | Monoclinic                                                    | Monoclinic                                                    | Monoclinic                                                    | Orthorhombic                                                  | Monoclinic                                                    | Monoclinic                                                    |
| <b>Space Group</b>             | <i>P2<sub>1</sub>/n</i>                                       | <i>Cc</i>                                                     | <i>P2<sub>1</sub>/n</i>                                       | <i>Pbc2<sub>1</sub></i>                                       | <i>P2<sub>1</sub>/n</i>                                       | <i>C2/c</i>                                                   |
| <b>a (Å)</b>                   | 7.718(5)                                                      | 20.478(4)                                                     | 7.821(3)                                                      | 9.0198(15)                                                    | 17.8576(19)                                                   | 8.139(2)                                                      |
| <b>b (Å)</b>                   | 18.754(11)                                                    | 7.1225(13)                                                    | 22.849(8)                                                     | 10.7769(18)                                                   | 9.9354(10)                                                    | 12.331(4)                                                     |
| <b>c (Å)</b>                   | 9.201(6)                                                      | 12.930(3)                                                     | 8.387(3)                                                      | 14.653(2)                                                     | 18.732(2)                                                     | 16.793(5)                                                     |
| <b><math>\alpha</math> (°)</b> | 90                                                            | 90.00                                                         | 90.00                                                         | 90                                                            | 90                                                            | 90                                                            |

|                                           |            |           |            |           |            |            |
|-------------------------------------------|------------|-----------|------------|-----------|------------|------------|
| $\beta$ (°)                               | 96.278(8)  | 94.578(9) | 91.286(15) | 90        | 105.457(4) | 98.031(13) |
| $\gamma$ (°)                              | 90         | 90.00     | 90.00      | 90        | 90         | 90         |
| V (Å <sup>3</sup> )                       | 1323.8(14) | 1879.9(7) | 1498.4(9)  | 1424.4(4) | 3203.3(6)  | 1668.9(8)  |
| $\rho_{\text{calc}}$ (g/cm <sup>3</sup> ) | 1.236      | 1.337     | 1.252      | 1.214     | 1.270      | 1.227      |
| F(000)                                    | 528        | 800.0     | 600.0      | 560       | 1296       | 656        |
| $\mu$ . (mm <sup>-1</sup> )               | 0.084      | 0.093     | 0.083      | 0.081     | 0.083      | 0.080      |
| T (K)                                     | 150(2)     | 150(2)    | 150(2)     | 150(2)    | 150(2)     | 150(2)     |
| $\lambda$ (Å)                             | 0.71073    | 0.71073   | 0.71073    | 0.71073   | 0.71073    | 0.71073    |
| <b>Total Reflns.</b>                      | 12859      | 9645      | 13123      | 14166     | 33416      | 7668       |
| <b>Unique Reflns.</b>                     | 3027       | 4273      | 3319       | 3257      | 7382       | 1915       |
| <b>Completeness (%)</b>                   | 99.7       | 99.0      | 97.3       | 100       | 99.9       | 99.1       |
| <b>R<sub>int</sub></b>                    | 0.111      | 0.100     | 0.113      | 0.079     | 0.112      | 0.109      |
| <b>R<sub>1</sub> (F<sup>2</sup>)</b>      | 0.0540     | 0.0652    | 0.0546     | 0.056     | 0.0796     | 0.0662     |
| <b>wR<sub>2</sub>(F<sup>2</sup>)</b>      | 0.1560     | 0.1948    | 0.1691     | 0.1282    | 0.2461     | 0.2119     |
| <b>Goof</b>                               | 1.09       | 1.06      | 1.10       | 1.02      | 1.12       | 1.09       |
| <b>2<math>\theta</math></b>               | 54         | 54        | 54         | 54        | 54         | 54         |

| <b>Compound</b>                | <b>13</b>                                                     | <b>14</b>                                                     | <b>15</b>                                                     | <b>16</b>                                                     | <b>17</b>                                                     | <b>18</b>                                                     |
|--------------------------------|---------------------------------------------------------------|---------------------------------------------------------------|---------------------------------------------------------------|---------------------------------------------------------------|---------------------------------------------------------------|---------------------------------------------------------------|
| <b>CCDC No.</b>                | 1060884                                                       | 1060885                                                       | 1060886                                                       | 1060887                                                       | 1060888                                                       | 1060889                                                       |
| <b>Molecular Formula</b>       | C <sub>17</sub> H <sub>16</sub> N <sub>4</sub> O <sub>2</sub> | C <sub>19</sub> H <sub>16</sub> N <sub>2</sub> O <sub>2</sub> | C <sub>20</sub> H <sub>17</sub> N <sub>1</sub> O <sub>2</sub> | C <sub>33</sub> H <sub>26</sub> N <sub>2</sub> O <sub>2</sub> | C <sub>33</sub> H <sub>34</sub> N <sub>4</sub> O <sub>4</sub> | C <sub>36</sub> H <sub>48</sub> N <sub>6</sub> O <sub>4</sub> |
| <b>Formula Weight</b>          | 308.34                                                        | 304.34                                                        | 303.35                                                        | 482.56                                                        | 550.64                                                        | 628.80                                                        |
| <b>Crystal System</b>          | Monoclinic                                                    | Monoclinic                                                    | Monoclinic                                                    | Triclinic                                                     | Triclinic                                                     | Triclinic                                                     |
| <b>Space Group</b>             | <i>P</i> 2 <sub>1</sub> / <i>c</i>                            | <i>P</i> 2 <sub>1</sub> / <i>n</i>                            | <i>P</i> 2 <sub>1</sub> / <i>n</i>                            | <i>P</i> □                                                    | <i>P</i> □                                                    | <i>P</i> □                                                    |
| <b>a (Å)</b>                   | 18.468(3)                                                     | 7.656(7)                                                      | 7.742(4)                                                      | 9.097(17)                                                     | 7.734(5)                                                      | 7.7071(19)                                                    |
| <b>b (Å)</b>                   | 7.2386(11)                                                    | 22.46(2)                                                      | 22.159(11)                                                    | 12.117(19)                                                    | 9.196(6)                                                      | 8.9632(19)                                                    |
| <b>c (Å)</b>                   | 11.831(2)                                                     | 8.940(8)                                                      | 9.100(5)                                                      | 12.53(2)                                                      | 20.844(14)                                                    | 12.790(2)                                                     |
| <b><math>\alpha</math> (°)</b> | 90                                                            | 90                                                            | 90                                                            | 73.19(5)                                                      | 101.370(15)                                                   | 78.86(4)                                                      |

|                                           |            |            |            |          |            |          |
|-------------------------------------------|------------|------------|------------|----------|------------|----------|
| $\beta$ (°)                               | 91.866(10) | 91.516(14) | 93.630(5)  | 81.98(5) | 94.21(3)   | 79.56(4) |
| $\gamma$ (°)                              | 90         | 90         | 90         | 75.42(5) | 96.022(17) | 83.81(4) |
| V (Å <sup>3</sup> )                       | 1580.8(4)  | 1537.0(2)  | 1558.0(14) | 1276(4)  | 1438.6(16) | 850.1(3) |
| $\rho_{\text{calc}}$ (g/cm <sup>3</sup> ) | 1.296      | 1.315      | 1.293      | 1.256    | 1.271      | 1.228    |
| F(000)                                    | 648        | 640        | 640        | 508      | 584        | 338      |
| $\mu$ . (mm <sup>-1</sup> )               | 0.088      | 0.087      | 0.083      | 0.078    | 0.085      | 0.081    |
| T (K)                                     | 150(2)     | 150(2)     | 150(2)     | 150(2)   | 150(2)     | 150(2)   |
| $\lambda$ (Å)                             | 0.71073    | 0.71073    | 0.71073    | 0.71073  | 0.71073    | 0.71073  |
| <b>Total Reflns.</b>                      | 16108      | 15342      | 15898      | 13607    | 15403      | 8736     |
| <b>Unique Reflns.</b>                     | 3628       | 3506       | 3558       | 5860     | 6586       | 3961     |
| <b>Completeness (%)</b>                   | 99.4       | 99.7       | 99.8       | 98.3     | 99.4       | 97.9     |
| <b>R<sub>int</sub></b>                    | 0.095      | 0.073      | 0.052      | 0.167    | 0.084      | 0.093    |
| <b>R<sub>1</sub> (F<sup>2</sup>)</b>      | 0.0663     | 0.0721     | 0.0503     | 0.1231   | 0.0729     | 0.0632   |
| <b>wR<sub>2</sub>(F<sup>2</sup>)</b>      | 0.2005     | 0.2240     | 0.1623     | 0.3809   | 0.2307     | 0.2029   |
| <b>GooF</b>                               | 1.06       | 1.15       | 1.16       | 1.00     | 1.07       | 0.98     |
| <b>2<math>\theta</math></b>               | 54         | 54         | 54         | 54       | 54         | 54       |

| <b>Compound</b>                | <b>19</b>                                                     | <b>20</b>                                                     | <b>21</b>                                                     | <b>22</b>                                                     |
|--------------------------------|---------------------------------------------------------------|---------------------------------------------------------------|---------------------------------------------------------------|---------------------------------------------------------------|
| <b>CCDC No.</b>                | 1060890                                                       | 1060891                                                       | 1060870                                                       | 1060871                                                       |
| <b>Molecular Formula</b>       | C <sub>22</sub> H <sub>23</sub> N <sub>2</sub> O <sub>2</sub> | C <sub>24</sub> H <sub>28</sub> N <sub>4</sub> O <sub>2</sub> | C <sub>29</sub> H <sub>24</sub> N <sub>4</sub> O <sub>2</sub> | C <sub>30</sub> H <sub>25</sub> N <sub>3</sub> O <sub>2</sub> |
| <b>Formula Weight</b>          | 347.42                                                        | 404.50                                                        | 460.52                                                        | 459.53                                                        |
| <b>Crystal System</b>          | Triclinic                                                     | Triclinic                                                     | Monoclinic                                                    | Monoclinic                                                    |
| <b>Space Group</b>             | <i>P</i> 1                                                    | <i>P</i> 1                                                    | <i>P</i> 2 <sub>1</sub> / <i>c</i>                            | <i>P</i> 2 <sub>1</sub> / <i>c</i>                            |
| <b>a (Å)</b>                   | 7.287(6)                                                      | 7.635(5)                                                      | 16.177(3)                                                     | 16.337(13)                                                    |
| <b>b (Å)</b>                   | 9.179(7)                                                      | 9.055(8)                                                      | 7.5746(13)                                                    | 7.599(6)                                                      |
| <b>c (Å)</b>                   | 14.419(11)                                                    | 17.237(13)                                                    | 19.698(4)                                                     | 19.883(15)                                                    |
| <b><math>\alpha</math> (°)</b> | 105.567(19)                                                   | 96.22(3)                                                      | 90                                                            | 90                                                            |



---

|                                           |            |             |            |            |
|-------------------------------------------|------------|-------------|------------|------------|
| $\beta$ (°)                               | 90.12(3)   | 94.09(2)    | 107.485(9) | 107.782(9) |
| $\gamma$ (°)                              | 93.375(19) | 113.734(15) | 90         | 90         |
| V (Å <sup>3</sup> )                       | 927.3(13)  | 1075.8(14)  | 2302.2(8)  | 2350.4(3)  |
| $\rho_{\text{calc}}$ (g/cm <sup>3</sup> ) | 1.244      | 1.249       | 1.329      | 1.299      |
| F(000)                                    | 370.0      | 432.0       | 968.0      | 968.0      |
| $\mu$ . (mm <sup>-1</sup> )               | 0.080      | 0.081       | 0.085      | 0.082      |
| T (K)                                     | 150(2)     | 150(2)      | 150(2)     | 150(2)     |
| $\lambda$ (Å)                             | 0.71073    | 0.71073     | 0.71073    | 0.71073    |
| <b>Total Reflns.</b>                      | 9785       | 10143       | 23137      | 24193      |
| <b>Unique Reflns.</b>                     | 4244       | 4226        | 5298       | 5409       |
| <b>Completeness (%)</b>                   | 98.8       | 99.6        | 99.2       | 99.9       |
| <b>R<sub>int</sub></b>                    | 0.094      | 0.113       | 0.104      | 0.158      |
| <b>R<sub>1</sub> (F<sup>2</sup>)</b>      | 0.0755     | 0.0586      | 0.0609     | 0.0974     |
| <b>wR<sub>2</sub>(F<sup>2</sup>)</b>      | 0.2921     | 0.1865      | 0.1852     | 0.2727     |
| <b>GooF</b>                               | 0.95       | 1.02        | 1.21       | 1.14       |
| <b>2<math>\theta</math></b>               | 54         | 52          | 54         | 54         |

---
